# Supplementary material
Source: PubMed Central journal article supplement (PMC10317474)
Supplement: NIHMS1902257-supplement-Appendix_1.pdf [file NIHMS1902257-supplement-Appendix_1.pdf]

APPROVAL

January 10, 2023

Steven Kornblau  
 Leukemia

On 1/10/2023, the IRB reviewed the following protocol:

|                                           |                                                                                                                                                                                                                                                    |
|-------------------------------------------|----------------------------------------------------------------------------------------------------------------------------------------------------------------------------------------------------------------------------------------------------|
| IRB ID                                    | LAB01-473_MOD010                                                                                                                                                                                                                                   |
| Type of Review:                           | Modification / Update                                                                                                                                                                                                                              |
| Level of Review:                          | Expedited                                                                                                                                                                                                                                          |
| Review Category:                          | (2)(b) Blood samples from others<br>(5) Data, documents, records, or specimens                                                                                                                                                                     |
| Title:                                    | BLOOD, MARROW AND PHERESIS<br>COLLECTION FROM PATIENTS WITH<br>HEMATOLOGICAL MALIGNANCIES FOR THE<br>STUDY OF CELL CYCLE, SIGNAL<br>TRANSDUCTION AND APOPTOSIS RELATED<br>PROTEINS IN HEMATOLOGICAL<br>MALIGNANCIES: A TISSUE BANKING<br>PROTOCOL. |
| Funding:                                  | Name: Baylor; Name: Genentech; Name:<br>Leukemia Spore, Funding Source ID: 5 P50<br>CA100632-09                                                                                                                                                    |
| IND, IDE or HDE:                          | None                                                                                                                                                                                                                                               |
| Documents Reviewed:                       | None                                                                                                                                                                                                                                               |
| Special<br>Determinations and<br>Waivers: | None                                                                                                                                                                                                                                               |

The IRB approved the modification on 1/10/2023. Investigators are required to submit a Continuing Review between 90 and 60 days prior to expiration. Investigators are required to conduct this Human Research in accordance with requirements in HRP-103 - INVESTIGATOR MANUAL.

As a reminder:

- Modifications to this study must be approved by the IRB in advance of implementing changes to the research
- New information related to this study must be reported to the IRB in accordance with institutional reporting requirements
- Close this study once all research activities are complete

APPROVAL

April 25, 2022

Elisabet Manasanch  
Lymphoma/Myeloma

On 4/25/2022, the IRB reviewed the following protocol:

|                     |                                                                                                                                      |
|---------------------|--------------------------------------------------------------------------------------------------------------------------------------|
| IRB ID              | PA15-0575_MOD011                                                                                                                     |
| Type of Review:     | Modification / Update                                                                                                                |
| Level of Review:    | Expedited                                                                                                                            |
| Review Category:    | (mm) Minor modification                                                                                                              |
| Home IRB:           | <a href="#">IRB 5</a>                                                                                                                |
| Title:              | Prospective observational study of clinical and genomic predictors of progression to myeloma in asymptomatic monoclonal gammopathies |
| Funding:            | Name: None (Not Unknown)                                                                                                             |
| Grant Title:        |                                                                                                                                      |
| Grant ID:           | None                                                                                                                                 |
| IND, IDE or HDE:    | None                                                                                                                                 |
| Documents Reviewed: | None                                                                                                                                 |

You will conduct this Human Research in accordance with requirements in HRP-103 - INVESTIGATOR MANUAL.

Sincerely,

Michelle Linares  
cc:

FWA #: 00000363

OHRP IRB Registration Number: IRB 5 IRB00006023

APPROVAL

August 19, 2022

Elisabet Manasanch  
 Lymphoma/Myeloma

On 8/19/2022, the IRB reviewed the following protocol:

|                     |                                                                                                                                                                                                                                                                                                                                                                           |
|---------------------|---------------------------------------------------------------------------------------------------------------------------------------------------------------------------------------------------------------------------------------------------------------------------------------------------------------------------------------------------------------------------|
| IRB ID              | 2015-0148_MOD020                                                                                                                                                                                                                                                                                                                                                          |
| Type of Review:     | Modification / Update                                                                                                                                                                                                                                                                                                                                                     |
| Level of Review:    | Expedited                                                                                                                                                                                                                                                                                                                                                                 |
| Review Category:    | None<br>(mm) Minor modification                                                                                                                                                                                                                                                                                                                                           |
| Home IRB:           | <a href="#">IRB 2</a>                                                                                                                                                                                                                                                                                                                                                     |
| Title:              | Phase II Trial Of Isatuximab With or Without Lenalidomide In Patients With High Risk Smoldering Multiple Myeloma                                                                                                                                                                                                                                                          |
| Funding:            | Name: MDACC; Name: Sanofi US Services Inc                                                                                                                                                                                                                                                                                                                                 |
| Grant Title:        |                                                                                                                                                                                                                                                                                                                                                                           |
| Grant ID:           | None                                                                                                                                                                                                                                                                                                                                                                      |
| IND, IDE or HDE:    | IND #132088                                                                                                                                                                                                                                                                                                                                                               |
| Documents Reviewed: | <ul style="list-style-type: none"> <li>• 2015-0148 IND Summary of Changes 07.29.2022.docx, Category: Other;</li> <li>• 2015-0148 ISA-LEN CLEAN VERSION 10 7.29.2022.docx, Category: IRB Protocol;</li> <li>• 2015-0148 ISA-LEN TC VERSION 10 7.29.2022.docx, Category: Other;</li> <li>• ICD2015-0148_MOD008 TC 8.2.2022.pdf, Category: Approved Consent Form;</li> </ul> |

The IRB approved the modification on 8/19/2022. Reconsent active patients within 30 days or the first clinic visit.

You will conduct this Human Research in accordance with requirements in HRP-103 - INVESTIGATOR MANUAL.

Sincerely,

Aleen George

cc:

FWA #: 00000363

OHRP IRB Registration Number: IRB 2 IRB00002203

APPROVAL

June 23, 2021

Paolo Strati  
 Lymphoma/Myeloma

On 6/16/2021, the IRB reviewed and approved the following protocol:

|                     |                                                                                                                                                                                                                                                                                                                                                                                                                                                                                                                                                                   |
|---------------------|-------------------------------------------------------------------------------------------------------------------------------------------------------------------------------------------------------------------------------------------------------------------------------------------------------------------------------------------------------------------------------------------------------------------------------------------------------------------------------------------------------------------------------------------------------------------|
| IRB ID              | 2005-0656_MOD009                                                                                                                                                                                                                                                                                                                                                                                                                                                                                                                                                  |
| Type of Review:     | Modification / Update                                                                                                                                                                                                                                                                                                                                                                                                                                                                                                                                             |
| Level of Review:    | Expedited                                                                                                                                                                                                                                                                                                                                                                                                                                                                                                                                                         |
| Review Category:    | None<br>None                                                                                                                                                                                                                                                                                                                                                                                                                                                                                                                                                      |
| Home IRB:           | <a href="#">IRB 2</a>                                                                                                                                                                                                                                                                                                                                                                                                                                                                                                                                             |
| Title:              | A Collection of Blood and Tissue Samples from Patients with Lymphoma and/or Myeloma and Normal Donors                                                                                                                                                                                                                                                                                                                                                                                                                                                             |
| Funding:            | Name: None (Not Unknown)                                                                                                                                                                                                                                                                                                                                                                                                                                                                                                                                          |
| Grant Title:        |                                                                                                                                                                                                                                                                                                                                                                                                                                                                                                                                                                   |
| Grant ID:           | None                                                                                                                                                                                                                                                                                                                                                                                                                                                                                                                                                              |
| IND, IDE or HDE:    | None                                                                                                                                                                                                                                                                                                                                                                                                                                                                                                                                                              |
| Documents Reviewed: | <ul style="list-style-type: none"> <li>• 2005-0656 Certificate of Translation dated April 23 2021.pdf, Category: Other;</li> <li>2005-0656 Informed Consent dated April 23 2021_ar.pdf(0.01)</li> <li>2005-0656 Informed Consent dated April 23 2021_chs.pdf(0.01)</li> <li>2005-0656 Informed Consent dated April 23 2021_es.pdf(0.01)</li> <li>2005-0656 Informed Consent dated April 23 2021_ja.pdf(0.01)</li> <li>2005-0656 Informed Consent dated April 23 2021_ko.pdf(0.01)</li> <li>2005-0656 Informed Consent dated April 23 2021_tr.pdf(0.01)</li> </ul> |

|                                                    |
|----------------------------------------------------|
| ICD2005-0656_MOD005.docx(0.01)<br>ePRTCL Smartform |
|----------------------------------------------------|

You will conduct this Human Research in accordance with requirements in the [Human Research Protection Program manual](#).

The IRB has made the determination that re-consenting is not required.

Sincerely,

Cimetra Cox

FWA #: 00000363

OHRP IRB Registration Number: IRB 2 IRB00002203

cc:
